# Supplementary material
Source: publisher figshare collection journal article supplement (https://tandf.figshare.com/ndownloader/files/21966765)
Supplement: Supplementary file 1 [file 21966765]

**Supplementary Material S1**

Table S1.1 Percentages of girls’ preferences for jobs including Core STEM jobs (bold) and general STEM jobs (italics). * Χ2 tests had 2 degrees of freedom.

| Occupation | % would like to do (2015) | % would like to do (2017) | % would NOT like to do (2015) | % would NOT like to do (2017) | % not sure (2015) | % not sure (2017) | Chi | Sig |
| --- | --- | --- | --- | --- | --- | --- | --- | --- |
| actor | 60.4 | 53.5 | 30.2 | 29.9 | 9.4 | 16.5 | 3.405 | 0.182 |
| athlete | 48.3 | 36.2 | 15.4 | 53.5 | 26.7 | 19.8 | 2.663 | 0.264 |
| **astronaut** | **19.5** | **39.1** | **15.4** | **70.7** | **68.5** | **9.8** | **3.202** | **0.202** |
| author | 37.5 | 41.9 | 47.6 | 32.6 | 14.9 | 25.6 | 8.66 | 0.013 |
| banker | 29.7 | 27.4 | 54.5 | 50.4 | 15.9 | 22.1 | 1.644 | 0.439 |
| civil servant | 13.8 | 10 | 69 | 80 | 17.2 | 10 | 0.926 | 0.629 |
| detective | 31 | 28.9 | 52.4 | 50.4 | 16.7 | 20.7 | 0.761 | 0.684 |
| *doctor* | *42.2* | *44.6* | *43.9* | *35.5* | *13.9* | *20.1* | *3.408* | *0.182* |
| **engineer** | **21.2** | **21.4** | **66.4** | **48.7** | **12.3** | **29.9** | **13.451** | **0.001** |
| entrepreneur | 15.8 | 17.6 | 55.3 | 52.9 | 28.9 | 29.4 | 0.037 | 0.982 |
| estate agent | 18.9 | 18.5 | 70 | 55.4 | 11.1 | 26.2 | 6.169 | 0.046 |
| farmer | 16.8 | 21.4 | 74.9 | 64.1 | 8.4 | 14.5 | 4.688 | 0.096 |
| firefighter | 15.1 | 14.6 | 70.9 | 65 | 14 | 20.4 | 2.357 | 0.308 |
| **game tester** | **40.3** | **47.7** | **45.1** | **35.1** | **14.6** | **17.1** | **2.598** | **0.273** |
| hairdresser | 67 | 69.6 | 22.2 | 16.7 | 10.8 | 13.8 | 1.819 | 0.403 |
| judge | 30.2 | 29.8 | 57.6 | 53.2 | 12.2 | 16.9 | 1.381 | 0.501 |
| lawyer | 31.1 | 26.6 | 58.5 | 55.9 | 10.4 | 18.3 | 3.303 | 0.192 |
| librarian | 28.8 | 37.8 | 58.1 | 41.3 | 13.1 | 21.4 | 8.431 | 0.015 |
| **mechanic** | **18.9** | **18.1** | **73.5** | **62.8** | **7.6** | **19.1** | **6.871** | **0.032** |
| *nurse* | *46.1* | *43.8* | *40.4* | 29.2 | 13.5 | 27 | 10.157 | 0.006 |
| **pilot** | **26.7** | **18.8** | **63** | **64.8** | **10.3** | **16.4** | **4.054** | **0.132** |
| politician | 14.1 | 18.4 | 57.7 | 60.5 | 28.2 | 21.1 | 0.848 | 0.655 |
| shopkeeper | 46.6 | 41.6 | 37.5 | 34.3 | 15.9 | 24.1 | 3.293 | 0.193 |
| soldier | 19.3 | 14.5 | 75 | 74 | 5.7 | 11.5 | 4.086 | 0.13 |
| **surveyor** | **6.4** | **7.4** | **72.3** | **74.1** | **21.3** | **18.5** | **0.098** | **0.952** |
| teacher | 71.3 | *62* | 17.1 | 18.2 | 11.6 | 19.7 | 4.436 | 0.109 |
| **technician** | **15.4** | **15.9** | **70.5** | **63.6** | **14.1** | **20.5** | **0.893** | **0.64** |
| tennis player | 26.3 | 32.8 | 60.9 | 48.5 | 12.8 | 18.7 | 4.941 | 0.085 |
| *vet* | *58.5* | *65.4* | *29* | *20.3* | *12.5* | *14.3* | *3.026* | *0.22* |
| *zoologist* | *32* | *28.1* | *52.6* | *57.8* | *15.5* | *14.1* | *0.43* | *0.806* |

Table S1.2 Percentages of boys’ preferences for jobs including Core STEM jobs (bold) and general STEM jobs (italics). * Χ2 tests had 2 degrees of freedom.

| Occupation | % would like to do (2015) | % would like to do (2017) | % would NOT like to do (2015) | % would NOT like to do (2017) | % not sure (2015) | % not sure (2017) | Chi | Sig |
| --- | --- | --- | --- | --- | --- | --- | --- | --- |
| actor | 29.7 | 31.9 | 56.8 | 46.4 | 13.5 | 21.7 | 4.358 | 0.113 |
| athlete | 51.4 | 51.8 | 38.7 | 32.5 | 9.9 | 15.8 | 2.474 | 0.29 |
| **astronaut** | **39.8** | **39.1** | **49.7** | **42.4** | **10.6** | **18.5** | **4.354** | **0.113** |
| author | 30.4 | 28.1 | 60.1 | 50.4 | 9.5 | 21.6 | 8.538 | 0.014 |
| banker | 35.6 | 38.8 | 54.8 | 40.3 | 9.6 | 20.9 | 9.214 | 0.01 |
| civil servant | 4.3 | 18.8 | 78.3 | 53.1 | 17.4 | 28.1 | 8.265 | 0.016 |
| detective | 48.7 | 47.6 | 44.2 | 29.4 | 7.1 | 23.1 | 17.104 | 0.001 |
| *doctor* | *22.4* | *27.5* | *68.9* | *54.2* | *8.7* | *18.3* | *8.971* | *0.011* |
| **engineer** | **38.4** | **54.9** | **48.3** | **31** | **13.2** | **14.1** | **9.862** | **0.007** |
| entrepreneur | 16.7 | 20 | 57.4 | 66.7 | 25.9 | 13.3 | 1.047 | 0.592 |
| estate agent | 33.7 | 32.6 | 50.5 | 46.1 | 15.8 | 21.3 | 0.987 | 0.61 |
| farmer | 21.6 | 21.9 | 69.8 | 61.9 | 8.6 | 16.1 | 4.347 | 0.114 |
| firefighter | 35 | 43.2 | 55.2 | 39.4 | 9.8 | 17.4 | 8.994 | 0.011 |
| **game tester** | **74.7** | **74.1** | **16** | **15.6** | **9.3** | **10.4** | **0.09** | **0.956** |
| hairdresser | 23.3 | 16.1 | 69.3 | 67.7 | 7.4 | 16.1 | 7.347 | 0.025 |
| judge | 25 | 27.2 | 64.7 | 51.7 | 10.3 | 21.1 | 8.071 | 0.018 |
| lawyer | 31.1 | 26.6 | 58.5 | 55 | 10.4 | 18.3 | 3.303 | 0.192 |
| librarian | 19.7 | 16.8 | 65.3 | 61.5 | 15 | 21.7 | 2.293 | 0.318 |
| **mechanic** | **43.3** | **54.2** | **46.1** | **31.3** | **10.6** | **14.5** | **6.303** | **0.043** |
| *nurse* | *14.8* | *11.5* | *73.5* | 75.7 | 11.7 | 12.8 | 0.777 | 0.678 |
| **pilot** | **40.6** | **45.6** | **47.1** | **36.2** | **12.3** | **18.1** | **4.308** | **0.116** |
| politician | 20.2 | 22.1 | 57.4 | 54.4 | 22.3 | 23.5 | 0.153 | 0.926 |
| shopkeeper | 34.6 | 32 | 51.9 | 52.3 | 13.6 | 15.7 | 0.394 | 0.821 |
| soldier | **45.3** | **50.7** | 42.2 | 34.2 | 12.4 | 15.1 | 2.192 | 0.334 |
| **surveyor** | **14.1** | **25.7** | **69** | **60** | **16.9** | **14.3** | **2.157** | **0.34** |
| teacher | 33.8 | 33.5 | 53.1 | 47.1 | 13.1 | 19.4 | 2.459 | 0.292 |
| **technician** | **24.7** | **37.5** | **57** | **40.6** | **18.3** | **21.9** | **4.331** | **0.115** |
| tennis player | 42.8 | 41.7 | 45.9 | 38.4 | 11.3 | 19.9 | 4.705 | 0.095 |
| *vet* | *35.2* | *32.2* | *53.7* | *43.4* | *11.1* | *24.3* | *9.741* | *0.008* |
| *zoologist* | *29.2* | *33.8* | *57.3* | *47.9* | *13.5* | *18.3* | *1.555* | *0.46* |

**Supplementary Material S2**

Percentages of participants’ preferences for STEM jobs in Year 5 comparison and intervention groups (Chi Square Test) *X2 tests had 2 degrees of freedom.

|  | 2015 | | | 2017 | | | |  |  |  |
| --- | --- | --- | --- | --- | --- | --- | --- | --- | --- | --- |
|  | would like to do | would NOT like to do | not sure | would like to do | would NOT like to do | not sure |  |  |  |  |
| **jobs** | **%** | **%** | **%** | **%** | **%** | **%** | **Chi** | | **Sig** | **Cramers V** |
| actor/actress | 46.9 | 40.6 | 12.6 | 47.8 | 39.3 | 12.9 | 0.058 | | 0.972 | 0.013 |
| **astronaut** | **45** | **41.4** | **13.6** | **51.5** | **30.7** | **17.8** | **4.319** | | **0.115** | **0.114** |
| athlete | 28.6 | 61.1 | 10.3 | 25 | 59.1 | 15.9 | 2.597 | | 0.273 | 0.086 |
| author | 25.3 | 62.4 | 12.4 | 39.1 | 42.5 | 18.4 | 14.183 | | 0.001 | 0.199 |
| banker | 26.3 | 61.5 | 12.2 | 29.7 | 50.3 | 20 | 5.176 | | 0.075 | 0.127 |
| civil servant | 8.3 | 77.8 | 13.9 | 9.7 | 71 | 19.4 | 0.594 | | 0.743 | 0.076 |
| detective | 29.2 | 60.2 | 10.5 | 35.1 | 42.5 | 22.4 | 13.553 | | 0.001 | 0.198 |
| *doctor* | *25.4* | *62.4* | *12.2* | *34.3* | *45.9* | *19.9* | *10.342* | | *0.006* | *0.169* |
| **engineer** | **25.9** | **63.3** | **10.8** | **40.1** | **36.6** | **23.3** | **24.782** | | **0.001** | **0.271** |
| entrepreneur | 18.6 | 58.1 | 23.3 | 15 | 75 | 10 | 1.972 | | 0.373 | 0.177 |
| estate agent | 23.1 | 67.5 | 9.4 | 23.2 | 47.3 | 29.5 | 16.039 | | 0.001 | 0.265 |
| farmer | 11.7 | 81 | 7.3 | 22.5 | 68.5 | 9 | 8.207 | | 0.017 | 0.152 |
| firefighter | 19.4 | 69.4 | 11.1 | 29.5 | 51.4 | 19 | 12.511 | | 0.002 | 0.186 |
| **game tester** | **54** | **34.8** | **11.2** | **62.3** | **27.5** | **10.2** | **2.413** | | **0.299** | **0.086** |
| hairdresser | 39.1 | 50.3 | 10.6 | 44.2 | 41.4 | 14.4 | 3.108 | | 0.211 | 0.093 |
| judge | 24.3 | 66.7 | 9 | 24.9 | 53.7 | 21.5 | 11.458 | | 0.003 | 0.18 |
| lawyer | 28.6 | 60.9 | 10.6 | 21.9 | 62.3 | 15.8 | 2.946 | | 0.229 | 0.098 |
| librarian | 12.6 | 73 | 14.4 | 26.5 | 52.9 | 20.6 | 15.827 | | 0.001 | 0.214 |
| **mechanic** | **26** | **64.9** | **9.1** | **37** | **45.5** | **17.5** | **12.395** | | **0.002** | **0.201** |
| *nurse* | *21.8* | *65.9* | *12.3* | *28.1* | *56.7* | *15.2* | *3.187* | | *0.203* | *0.094* |
| **pilot** | **28.9** | **60.1** | **11** | **28.7** | **55.1** | **16.3** | **2.201** | | **0.333** | **0.079** |
| politician | 14.6 | 67 | 18.4 | 18.8 | 62.4 | 18.8 | 0.671 | | 0.715 | 0.06 |
| shopkeeper | 31.1 | 52.8 | 16.1 | 31.3 | 49.7 | 19 | 0.59 | | 0.745 | 0.041 |
| soldier | 29.2 | 61.2 | 9.6 | 35.6 | 55 | 9.4 | 1.711 | | 0.425 | 0.069 |
| **surveyor** | **6.3** | **89.1** | **4.7** | **14.9** | **66** | **19.1** | **9.11** | | **0.011** | **0.286** |
| teacher | 42.3 | 44.5 | 13.2 | 46.7 | 34.1 | 19.2 | 4.97 | | 0.083 | 0.117 |
| **technician** | **19.8** | **68.9** | **11.3** | **27.1** | **53.1** | **19.8** | **5.534** | | **0.063** | **0.166** |
| tennis player | 24.4 | 62.8 | 12.8 | 31.1 | 49.2 | 19.8 | 7.06 | | 0.029 | 0.141 |
| *vet* | *24* | *61.5* | *12.8* | *30.9* | *46.6* | *17.4* | *9.429* | | *0.024* | *0.163* |
| *zoologist* | *24.8* | *57.5* | *17.7* | *34* | *51.5* | *14.4* | *2.219* | | *0.33* | *0.103* |
